# Supplementary material for: Dissolved Organic Matter (DOM) in a Warm-Temperate Forested Watershed—A Possibility of Ultraviolet Absorbance as an Indicator of DOM
Source: MDPI journal article supplement (doi:10.3390/f13040510), 2022-03-25
Supplement: s1 [file s1]

## Article

# Supplementary Materials: Dissolved Organic Matter (DOM) in a Warm-Temperate Forested Watershed—A Possibility of Ultraviolet Absorbance as an Indicator of DOM

Shinji Kaneko<sup>1</sup> , Hitomi Furusawa<sup>2</sup> , Toru Okamoto<sup>1</sup>  and Yasuhiro Hirano<sup>3</sup> 

<sup>1</sup> Kansai Research Center, Forestry and Forest Products Research Institute (FFPRI), Kyoto, Japan; kanekos@ffpri.affrc.go.jp (S.K.); okamoto@ffpri.affrc.go.jp (T.O.)

<sup>2</sup> Forest Environment Division, Forestry and Forest Products Research Institute (FFPRI), Tsukuba, Japan; fu1103@ffpri.affrc.go.jp

<sup>3</sup> Graduate School of Environmental Studies, Nagoya University, Nagoya, Japan; yhirano@nagoya-u.jp

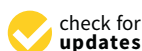

**Citation:** Kaneko, S.; Furusawa, H.; Okamoto, T.; Hirano, Y. Dissolved Organic Matter in a Warm-Temperate Forested Watershed. *Forests* **2022**, *13*, 510. <https://doi.org/10.3390/f13040510>

Academic Editor:  
Francisca C. Aguiar

Received: 18 February 2022

Accepted: 21 March 2022

Published: 25 March 2022

**Publisher's Note:** MDPI stays neutral with regard to jurisdictional claims in published maps and institutional affiliations.

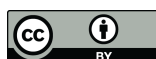

**Copyright:** © 2022 by the authors. Licensee MDPI, Basel, Switzerland. This article is an open access article distributed under the terms and conditions of the Creative Commons Attribution (CC BY) license (<https://creativecommons.org/licenses/by/4.0/>).

**Table S1.** Soil chemical properties of the YMS.\*

| Horizon | Depth<br>cm | pH(H <sub>2</sub> O) | pH(KCl) | C<br>g kg <sup>-1</sup> | N<br>g kg <sup>-1</sup> | C/N  | CEC<br>cmol(+) kg <sup>-1</sup> | Ca<br>cmol(+) kg <sup>-1</sup> | Mg<br>cmol(+) kg <sup>-1</sup> | K<br>cmol(+) kg <sup>-1</sup> | Na<br>cmol(+) kg <sup>-1</sup> | Base Satur.<br>% |
|---------|-------------|----------------------|---------|-------------------------|-------------------------|------|---------------------------------|--------------------------------|--------------------------------|-------------------------------|--------------------------------|------------------|
| A1      | 0-3         | 4.49                 | 3.48    | 27.5                    | 1.76                    | 15.6 | 13.35                           | 2.46                           | 0.55                           | 0.21                          | 0.40                           | 27.2             |
| AB      | 3-24        | 4.74                 | 3.65    | 10.5                    | 0.66                    | 15.9 | 8.05                            | 0.36                           | 0.13                           | 0.10                          | 0.09                           | 8.4              |
| BC      | 24-63       | 5.17                 | 3.91    | 1.6                     | 0.10                    | 15.3 | 5.28                            | 1.36                           | 0.28                           | 0.19                          | 0.13                           | 37.2             |
| C       | 63-83       | 5.23                 | 3.92    | 4.2                     | 0.29                    | 14.6 | 6.51                            | 2.10                           | 0.46                           | 0.06                          | 0.09                           | 41.6             |

\* Soil samples were collected from the same location as the soil-percolating water samples.

**Table S2.** Soil physical properties of the YMS.\*

| Horizon | C. Sand<br>2–0.2mm | F. Sand<br>0.2–0.02mm | Silt<br>0.02–0.002mm | Clay<br>0.002mm> | Soil texture |
|---------|--------------------|-----------------------|----------------------|------------------|--------------|
| A1      | 45                 | 33                    | 13                   | 9                | SL           |
| AB      | 47                 | 32                    | 9                    | 12               | SL           |
| BC      | 66                 | 26                    | 5                    | 3                | LS           |
| C       | 63                 | 29                    | 6                    | 3                | LS           |

\* Soil samples were collected from the same location as the soil-percolating water samples.

**Table S3.** Total precipitation, average water temperature, and average water chemical constituents for all sample types at the YMS from July 2002 to March 2004.

| Sample type | Precipitation mm | WT °C | pH   | EC mS m <sup>-1</sup> | DOC mgC L <sup>-1</sup> | DON mgN L <sup>-1</sup> | DOC /DON | T-N mg N L <sup>-1</sup> | UV <sub>254</sub> cm <sup>-1</sup> | SUVA <sub>254</sub> L mg C <sup>-1</sup> m <sup>-1</sup> | Si mg L <sup>-1</sup> | N       |
|-------------|------------------|-------|------|-----------------------|-------------------------|-------------------------|----------|--------------------------|------------------------------------|----------------------------------------------------------|-----------------------|---------|
| Rv          | 2431             |       | 4.86 | 1.21                  | 1.16                    | 0.09                    | 21.1     | 0.41                     | 0.019                              | 2.53                                                     |                       | 41 (27) |
| Rr          | 2243             |       | 4.74 | 1.55                  | 1.31                    | 0.05                    | 19.5     | 0.28                     | 0.012                              | 1.07                                                     |                       | 41 (29) |
| Rd          | 2319             |       | 4.83 | 1.29                  | 1.83                    | 0.10                    | 21.1     | 0.43                     | 0.018                              | 1.35                                                     |                       | 40 (29) |
| TF          | 1681             |       | 5.41 | 2.28                  | 5.69                    | 0.21                    | 27.6     | 0.81                     | 0.150                              | 2.72                                                     |                       | 42 (40) |
| SF          |                  |       | 5.77 | 2.42                  | 13.64                   | 0.44                    | 31.1     | 0.59                     | 0.416                              | 3.16                                                     |                       | 45 (35) |
| O leachate  |                  |       | 4.51 | 7.98                  | 31.00                   | 1.36                    | 26.8     | 4.97                     | 1.198                              | 3.94                                                     |                       | 36 (34) |
| So10        |                  |       | 4.63 | 4.52                  | 16.74                   | 0.61                    | 30.5     | 2.30                     | 0.519                              | 3.09                                                     |                       | 26 (20) |
| So30        |                  |       | 4.92 | 4.26                  | 14.25                   | 0.47                    | 28.3     | 2.47                     | 0.374                              | 2.73                                                     |                       | 21 (17) |
| So70        |                  |       | 5.23 | 6.11                  | 22.88                   | 0.98                    | 37.2     | 2.48                     | 0.716                              | 3.11                                                     |                       | 33 (22) |
| SPa         |                  | 14.7  | 7.15 | 7.28                  | 0.97                    | ND                      | ND       | 0.86                     | 0.033                              | 3.72                                                     | 12.5                  | 45 (2)  |
| SPb         |                  | 14.3  | 7.09 | 6.13                  | 0.89                    | 0.04                    | 27.0     | 0.90                     | 0.028                              | 3.36                                                     | 12.1                  | 45 (2)  |
| STa         |                  | 14.0  | 7.09 | 6.92                  | 2.06                    | 0.04                    | 33.4     | 0.65                     | 0.086                              | 4.17                                                     | 12.0                  | 45 (2)  |
| STb         |                  | 14.3  | 7.14 | 6.66                  | 1.72                    | 0.03                    | 46.2     | 0.70                     | 0.064                              | 3.94                                                     | 12.1                  | 45 (2)  |
| STc         |                  | 14.2  | 7.11 | 6.58                  | 2.01                    | 0.02                    | 68.7     | 1.07                     | 0.070                              | 3.56                                                     | 11.0                  | 45 (2)  |
| STw         |                  | 14.6  | 7.17 | 6.34                  | 2.42                    | 0.10                    | 24.2     | 1.25                     | 0.082                              | 3.44                                                     | 10.8                  | 46 (6)  |

WT, simple average of water temperature. pH was calculated based on the weight-average proton concentration. Data are shown as the weight-average for bulk rains (Rv, Rr, and Rd), TF, SF, O leachate, and soil-percolating waters (So10, So30, and So70); they are shown as the simple average for seepage waters (SPa and SPb) and stream waters (STa, STb, STc, and STw). N indicates the number of samples except for DON, DOC/DON, and T-N; numbers in brackets indicate the number of samples for DON, DOC/DON, and T-N. The values for DON and DOC/DON of SPa are not shown because the DON values were negative. N, the number of measured samples. See Figure 1 for the meaning of the abbreviations.

**Table S4.** Average ion concentration in all sample types at the YMS from July 2002 to March 2004.

| Sample type | H <sup>+</sup><br>μmol L <sup>-1</sup> | Ca <sup>2+</sup><br>μmol L <sup>-1</sup> | Mg <sup>2+</sup><br>μmol L <sup>-1</sup> | Na <sup>+</sup><br>μmol L <sup>-1</sup> | K <sup>+</sup><br>μmol L <sup>-1</sup> | NH <sub>4</sub> <sup>+</sup><br>μmol L <sup>-1</sup> | Cl <sup>-</sup><br>μmol L <sup>-1</sup> | NO <sub>3</sub> <sup>-</sup><br>μmol L <sup>-1</sup> | NO <sub>2</sub> <sup>-</sup><br>μmol L <sup>-1</sup> | PO <sub>4</sub> <sup>3-</sup><br>μmol L <sup>-1</sup> | SO <sub>4</sub> <sup>2-</sup><br>μmol L <sup>-1</sup> | HCO <sub>3</sub> <sup>-</sup><br>μmol L <sup>-1</sup> | Cations<br>μeq L <sup>-1</sup> | Anions<br>μeq L <sup>-1</sup> | C/A  |
|-------------|----------------------------------------|------------------------------------------|------------------------------------------|-----------------------------------------|----------------------------------------|------------------------------------------------------|-----------------------------------------|------------------------------------------------------|------------------------------------------------------|-------------------------------------------------------|-------------------------------------------------------|-------------------------------------------------------|--------------------------------|-------------------------------|------|
| Rv          | 13.8                                   | 6.9                                      | 2.1                                      | 12.4                                    | 6.4                                    | 10.4                                                 | 17.1                                    | 12.9                                                 | 0.6                                                  | 0.1                                                   | 12.7                                                  |                                                       | 60.9                           | 56.5                          | 1.08 |
| Rr          | 18.3                                   | 7.8                                      | 2.2                                      | 16.1                                    | 2.9                                    | 12.8                                                 | 18.1                                    | 20.6                                                 | 0.5                                                  | 0.0                                                   | 15.8                                                  |                                                       | 70.1                           | 71.2                          | 0.99 |
| Rd          | 14.9                                   | 9.8                                      | 1.8                                      | 12.0                                    | 2.7                                    | 10.3                                                 | 15.9                                    | 14.6                                                 | 0.6                                                  | 0.0                                                   | 12.8                                                  |                                                       | 63.1                           | 57.0                          | 1.11 |
| TF          | 3.9                                    | 19.5                                     | 10.3                                     | 15.5                                    | 69.1                                   | 21.3                                                 | 36.7                                    | 24.4                                                 | 1.0                                                  | 0.1                                                   | 21.3                                                  |                                                       | 169.3                          | 105.8                         | 1.60 |
| SF          | 1.7                                    | 32.1                                     | 19.2                                     | 19.7                                    | 69.7                                   | 10.7                                                 | 33.2                                    | 17.4                                                 | 0.7                                                  | 0.0                                                   | 24.8                                                  |                                                       | 204.4                          | 102.1                         | 2.00 |
| O leachate  | 31.1                                   | 183.9                                    | 76.3                                     | 41.8                                    | 127.1                                  | 32.7                                                 | 119.9                                   | 307.9                                                | 2.0                                                  | 1.0                                                   | 48.9                                                  |                                                       | 764.0                          | 530.6                         | 1.44 |
| So10        | 23.5                                   | 84.1                                     | 13.8                                     | 53.4                                    | 23.8                                   | 18.3                                                 | 57.5                                    | 117.9                                                | 1.1                                                  | 0.1                                                   | 38.8                                                  |                                                       | 314.3                          | 246.8                         | 1.27 |
| So30        | 11.6                                   | 84.9                                     | 17.1                                     | 75.4                                    | 26.3                                   | 16.0                                                 | 56.9                                    | 129.7                                                | 0.8                                                  | 0.7                                                   | 35.1                                                  |                                                       | 328.2                          | 259.1                         | 1.27 |
| So70        | 5.8                                    | 147.7                                    | 29.2                                     | 161.6                                   | 11.3                                   | 7.9                                                  | 134.7                                   | 139.9                                                | 0.8                                                  | 5.3                                                   | 50.5                                                  |                                                       | 540.3                          | 392.5                         | 1.38 |
| SPa         | 0.2                                    | 61.6                                     | 27.0                                     | 466.2                                   | 20.5                                   | 8.8                                                  | 157.3                                   | 84.7                                                 | 0.5                                                  | 0.0                                                   | 90.9                                                  | 245.1                                                 | 584.4                          | 578.6                         | 1.01 |
| SPb         | 0.1                                    | 57.0                                     | 24.4                                     | 348.5                                   | 17.7                                   | 7.6                                                  | 128.1                                   | 73.8                                                 | 0.5                                                  | 0.0                                                   | 79.9                                                  | 178.0                                                 | 455.3                          | 460.3                         | 0.99 |
| STa         | 0.1                                    | 70.7                                     | 32.3                                     | 379.6                                   | 25.4                                   | 8.3                                                  | 153.2                                   | 66.6                                                 | 0.5                                                  | 0.0                                                   | 83.8                                                  | 225.1                                                 | 516.5                          | 529.2                         | 0.98 |
| STb         | 0.1                                    | 63.9                                     | 27.8                                     | 390.6                                   | 23.3                                   | 8.0                                                  | 152.6                                   | 80.7                                                 | 0.5                                                  | 0.0                                                   | 85.2                                                  | 195.3                                                 | 502.0                          | 514.4                         | 0.98 |
| STc         | 0.1                                    | 76.1                                     | 36.4                                     | 328.9                                   | 27.2                                   | 7.2                                                  | 143.3                                   | 71.5                                                 | 2.6                                                  | 0.0                                                   | 81.2                                                  | 201.5                                                 | 475.9                          | 500.1                         | 0.95 |
| STw         | 0.1                                    | 79.1                                     | 38.5                                     | 322.5                                   | 29.8                                   | 6.9                                                  | 142.3                                   | 66.4                                                 | 0.6                                                  | 0.0                                                   | 79.8                                                  | 209.8                                                 | 476.8                          | 494.6                         | 0.97 |

Data are shown as the weight-average for bulk rains (Rv, Rr, and Rd), TF, SF, O leachate, and soil-percolating waters (So10, So30, and So70); they are shown as the simple average for seepage waters (SPa and SPb) and stream waters (STa, STb, STc, and STw). C/A, ratio of cations to anions. See Figure 1 for the meaning of the abbreviations.

**Table S5.** Annual flux of water and elements for all sample types at the YMS.

| Sample type | Precipitation mm | DOC g m <sup>-2</sup> | DON g m <sup>-2</sup> | Si g m <sup>-2</sup> | H <sup>+</sup> mmolc m <sup>-2</sup> | Ca <sup>2+</sup> mmolc m <sup>-2</sup> | Mg <sup>2+</sup> mmolc m <sup>-2</sup> | Na <sup>+</sup> mmolc m <sup>-2</sup> | K <sup>+</sup> mmolc m <sup>-2</sup> | NH <sub>4</sub> <sup>+</sup> mmolc m <sup>-2</sup> | Cl <sup>-</sup> mmolc m <sup>-2</sup> | NO <sub>3</sub> <sup>-</sup> mmolc m <sup>-2</sup> | NO <sub>2</sub> <sup>-</sup> mmolc m <sup>-2</sup> | PO <sub>4</sub> <sup>3-</sup> mmolc m <sup>-2</sup> | SO <sub>4</sub> <sup>2-</sup> mmolc m <sup>-2</sup> | HCO <sub>3</sub> <sup>-</sup> mmolc m <sup>-2</sup> |
|-------------|------------------|-----------------------|-----------------------|----------------------|--------------------------------------|----------------------------------------|----------------------------------------|---------------------------------------|--------------------------------------|----------------------------------------------------|---------------------------------------|----------------------------------------------------|----------------------------------------------------|-----------------------------------------------------|-----------------------------------------------------|-----------------------------------------------------|
| Rv          | 1455             | 1.69                  | 0.15                  | ND                   | 20.0                                 | 10.1                                   | 3.0                                    | 18.1                                  | 9.3                                  | 15.1                                               | 24.9                                  | 18.8                                               | 0.9                                                | 0.1                                                 | 18.5                                                | ND                                                  |
| Rr          | 1302             | 1.85                  | 0.13                  | ND                   | 25.8                                 | 11.0                                   | 3.1                                    | 22.7                                  | 4.1                                  | 18.0                                               | 25.6                                  | 29.1                                               | 0.7                                                | 0.0                                                 | 22.2                                                | ND                                                  |
| Rd          | 1346             | 2.58                  | 0.12                  | ND                   | 21.1                                 | 13.9                                   | 2.5                                    | 16.9                                  | 3.8                                  | 14.5                                               | 22.4                                  | 20.6                                               | 0.9                                                | 0.0                                                 | 18.1                                                | ND                                                  |
| TF          | 976              | 5.56                  | 0.20                  | ND                   | 3.7                                  | 19.0                                   | 10.1                                   | 15.1                                  | 67.4                                 | 20.8                                               | 35.8                                  | 23.8                                               | 1.0                                                | 0.1                                                 | 20.8                                                | ND                                                  |
| SF          | 13               | 0.17                  | 0.01                  | ND                   | 0.0                                  | 0.4                                    | 0.2                                    | 0.2                                   | 0.9                                  | 0.1                                                | 0.4                                   | 0.2                                                | 0.0                                                | 0.0                                                 | 0.3                                                 | ND                                                  |
| O leachate  | 879              | 27.24                 | 1.22                  | 1.99                 | 27.3                                 | 161.6                                  | 67.1                                   | 36.8                                  | 111.7                                | 28.7                                               | 105.4                                 | 270.6                                              | 1.8                                                | 0.9                                                 | 42.9                                                | ND                                                  |
| So10        | 670              | 12.96                 | 0.47                  | (2.08)               | 18.1                                 | 65.1                                   | 10.7                                   | 41.4                                  | 18.5                                 | 14.0                                               | 44.7                                  | 90.9                                               | 0.8                                                | 0.1                                                 | 27.2                                                | ND                                                  |
| So30        | 670              | 11.04                 | 0.36                  | (0.95)               | 9.2                                  | 65.7                                   | 13.2                                   | 59.8                                  | 20.8                                 | 12.7                                               | 43.7                                  | 100.4                                              | 0.6                                                | 0.5                                                 | 27.2                                                | ND                                                  |
| So70        | 670              | 17.71                 | 0.76                  | (4.19)               | 4.5                                  | 114.3                                  | 22.6                                   | 125.1                                 | 8.8                                  | 6.1                                                | 104.3                                 | 108.4                                              | 0.6                                                | 4.1                                                 | 39.1                                                | ND                                                  |
| SPa         | 670              | 0.65                  | ND                    | 7.25                 | 0.1                                  | 41.3                                   | 18.1                                   | 312.5                                 | 13.8                                 | 5.9                                                | 105.4                                 | 56.8                                               | 0.3                                                | 0.0                                                 | 60.9                                                | 164.3                                               |
| SPb         | 670              | 0.59                  | (0.02)                | 7.02                 | 0.1                                  | 38.2                                   | 16.4                                   | 233.6                                 | 11.9                                 | 5.1                                                | 85.9                                  | 49.5                                               | 0.3                                                | 0.0                                                 | 53.6                                                | 119.3                                               |
| STa         | 670              | 1.38                  | (0.03)                | 6.98                 | 0.1                                  | 47.4                                   | 21.6                                   | 254.5                                 | 17.1                                 | 5.6                                                | 102.7                                 | 44.6                                               | 0.3                                                | 0.0                                                 | 56.2                                                | 150.9                                               |
| STb         | 670              | 1.15                  | (0.02)                | 7.04                 | 0.1                                  | 42.8                                   | 18.6                                   | 261.9                                 | 15.6                                 | 5.4                                                | 102.3                                 | 54.1                                               | 0.4                                                | 0.0                                                 | 57.1                                                | 130.9                                               |
| STc         | 670              | 1.35                  | (0.02)                | 6.38                 | 0.1                                  | 51.0                                   | 24.4                                   | 220.5                                 | 18.2                                 | 4.8                                                | 96.0                                  | 47.9                                               | 1.8                                                | 0.0                                                 | 54.4                                                | 135.0                                               |
| STw         | 670              | 1.62                  | (0.07)                | 6.29                 | 0.0                                  | 53.0                                   | 25.8                                   | 216.2                                 | 20.0                                 | 4.6                                                | 95.4                                  | 44.5                                               | 0.4                                                | 0.0                                                 | 53.5                                                | 140.6                                               |

Data in parenthesis indicate that the number of samples was small (<4). ND, no data. See Figure 1 for the meaning of the abbreviations.
